# Supplementary material for: A Nutrition Screening Form for Female Infertility Patients
Source: Atypon-hosted journal article supplement (doi:10.3148/cjdpr-2014-024), 2014-11-20
Supplement: cjdpr-2014-024suppl.pdf [file cjdpr-2014-024suppl.pdf]

## Supplementary Table 1

### Nutrition Screening Form for Female Infertility Patients

This is a routine screening form that covers the role of diet and lifestyle in your general health.

Do you agree for our office to give this to our Registered Dietitian?

Yes \_\_\_ NO \_\_\_ (please initial) \_\_\_

Name: \_\_\_\_\_ DOB \_\_\_ Age: \_\_\_ Date \_\_\_\_\_

Physician: \_\_\_\_\_ M/F married/single/partner

#### Weight History:

Ht: \_\_\_ Wt: \_\_\_ Highest adult wt: \_\_\_ (19 ) Lowest adult wt: \_\_\_ (19 )

Comments: \_\_\_\_\_

What is your desired weight? \_\_\_\_\_

Have you ever been on a diet?  yes  no

If yes, explain type(s) of diet(s) and your success/outcome

\_\_\_\_\_

#### Physical Activity:

Activity Level:  sedentary  low  mod  active  very active  extremely active

What kind of physical activity? \_\_\_\_\_

How often do you exercise per week: \_\_\_x/wk @ \_\_\_ min/hr per session

#### Diet History:

I eat :  1  2  3  \_\_\_ meals/day and \_\_\_ snacks/day

I usually skip  breakfast  lunch  dinner

I usually  eat on the run  pack own lunch/snacks  prepare meals at home

eat out \_\_\_x/day \_\_\_x/wk Who cooks at home? \_\_\_\_\_ Shops? \_\_\_\_\_

My style of eating is  vegan  semi-vegetarian  lacto/ovo vegetarian (milk/eggs)

macrobiotic  \_\_\_\_\_ culture/ethnic/religious background

low fat diet  low fat/low cholesterol diet  high vegetable/fruit diet

I avoid:

all animal products  red meat  chicken  fish  eggs  milk/products

wheat/products  fats/oils \_\_\_\_\_

citrus fruits  others \_\_\_\_\_

I eat: red meat \_\_\_x/wk \_\_\_x/mo; poultry \_\_\_x/wk \_\_\_x/mo; fish \_\_\_x/wk \_\_\_x/mo

I eat legumes, tofu, other soy products \_\_\_x/wk \_\_\_x/mo; others \_\_\_\_\_

My favourite foods are: \_\_\_\_\_

My least favourite foods are: \_\_\_\_\_

I enjoy eating  I feel guilty if I eat too much  I do not enjoy eating

I have an eating disorder  I had an eating disorder in the past (19 \_\_\_)

I have restricted my eating in the past \_\_\_\_\_

**Fluid Intake:** water \_\_\_c/day milk \_\_\_c/day soymilk \_\_\_c/day juice \_\_\_c/day

alcohol \_\_\_/week (  beer  wine  spirits (whiskey, gin, rum, vodka)

Coffee \_\_\_c/day colas \_\_\_c/day tea \_\_\_c/day herbal tea \_\_\_c/day kind(s) \_\_\_\_\_

Note: c = cups 1 alcoholic drink = 12 oz beer, 5 oz wine, 1.5 oz spirits

**Other lifestyle habits:**

smoker \_\_\_/day for \_\_\_ yrs  non-smoker quit \_\_\_ (19 \_\_\_) Sleep \_\_\_hrs/day

other drugs \_\_\_\_\_ (marijuana, cocaine, steroids etc)

**Do you take dietary Supplements?**  yes  no

multivitamin  calcium  iron  vit. C  vit. E  Vit A  B-carotene

herbals  anabolic steroids  Growth hormone  other supplements

Please list details below:

Brand name      type      Amount/pill      # taken/day

\_\_\_\_\_

I have **food sensitivities/allergies** (describe) \_\_\_\_\_

**Medications** (describe Over The Counter and Prescription):

\_\_\_\_\_

**Stress**

I would rate my stress level as:

- high
- high to moderate
- moderate
- low to moderate
- low

Comments: \_\_\_\_\_

**I would like to make an appointment with the nutritionist/Registered Dietitian**

to have a diet/lifestyle assessment for myself and/or partner  yes  no

For a complete nutrition assessment and lifestyle check make an appointment with the clinic dietitian/nutritionist. **A 3-day food record is requested for the initial visit.**
