# Supplementary material for: A Nutrition Screening Form for Female Infertility Patients
Source: Atypon-hosted journal article supplement (doi:10.3148/cjdpr-2014-024), 2014-11-20
Supplement: cjdpr-2014-024suppl.pdf [file cjdpr-2014-024suppl.pdf]

 


## Create a new account

Email

Returning user

## Request Username

Can't sign in? Forgot your username?

Enter your email address below and we will send you your username

**Email\***

Close

If the address matches an existing account you will receive an email with instructions to retrieve your username

close

##### LOGIN TO YOUR ACCOUNT

INDIVIDUAL LOGIN | REGISTER
or


INSTITUTIONAL LOGIN

- Login
- Register

**Email\***

**Password\***

Forgot password?
Reset it here

Keep me logged in

All fields with \* are mandatory

**Email\***

All fields with \* are mandatory

Already have an account? Login here

## Change Password

Old Password

New Password


Too Short
Weak
Medium
Strong
Very Strong
Too Long

#### Your password must have 8 characters or more and contain 3 of the following:

- a lower case character,
- an upper case character,
- a special character
- or a digit

Too Short

## Password Changed Successfully

Your password has been changed

Can't sign in? Forgot your password?

Enter your email address below and we will send you the reset instructions

**Email\***

Cancel

If the address matches an existing account you will receive an email with instructions to reset your password

Close

## Verify Phone

Enter the verification code

Cancel

## Congrats!

Your Phone has been verified

close

CLOSE

- Anywhere
- Citation

SearchSearch

SearchSearch

Advanced searchCitation search

Suggested Terms:

- librarians
- sample issues
- publication fees
- latest issues
- blog

Cart
0

Register
Login

**Canadian Journal of Dietetic Practice and Research**

- Browse Content
  - List of Issues
  - Current Issue
- Authors
  - Guide for authors
  - License form
  - Supported file formats
  - Submit a manuscript
  - Open Access
- Reviewers
  - Guidelines for Reviewers
- Subscribe
  - Subscription Information
  - Recommend to a librarian
- About
  - Editorial board
  - Advertise
  - Rights and Permissions
  - Contact Us
- DC Member Login

# Cookie Absent

**© Copyright 2024 – Dietitians of Canada**
